# Supplementary material for: Evaluation and Monitoring of the Natural Toxin Ptaquiloside in Bracken Fern, Meat, and Dairy Products
Source: MDPI journal article supplement (doi:10.3390/toxins15030231), 2023-03-21
Supplement: s1 [file s1]

## Supplementary Materials

**Table S1.** Multiple reaction monitoring (MRM) parameters and retention time for target compound.

| Analyte      | Monoisotopic mass (g/mol) | Precursor ion ( $m/z$ ) | Ionization state     | Product ion ( $m/z$ ) | Collision energy (eV) | Retention time (min) |
|--------------|---------------------------|-------------------------|----------------------|-----------------------|-----------------------|----------------------|
| Ptaquiloside | 398.1                     | 399                     | [M + H] <sup>+</sup> | <u>181</u> *          | 16                    | 3.21                 |
|              |                           |                         |                      | 381                   | 10                    |                      |
|              |                           |                         |                      | 277                   | 10                    |                      |

\*Underlined ion is quantitative ion, and other ions are qualitative ions.

**Table S2.** Detailed LC–MS parameters.

| Parameter                                 | Conditions                                                                                                                                                                          |
|-------------------------------------------|-------------------------------------------------------------------------------------------------------------------------------------------------------------------------------------|
| Liquid chromatograph<br>Mass spectrometer | Vanquish UHPLC (Thermo Fisher Scientific, California, USA)<br>TSQ Altis (Thermo Fisher Scientific, California, USA)                                                                 |
| Column                                    | Kinetex 2.6- $\mu$ m C18 100 Å (100 × 21 mm <sup>2</sup> )                                                                                                                          |
| Mobile Phase                              | A: Water with 0.1% of formic acid (v/v)<br>B: Acetonitrile with 0.1% of formic acid (v/v)                                                                                           |
| Flow rate                                 | 0.5 mL/min                                                                                                                                                                          |
| Injection volume                          | 10 $\mu$ L                                                                                                                                                                          |
| Column temperature                        | 35 °C                                                                                                                                                                               |
| Ion mode                                  | ESI positive                                                                                                                                                                        |
| The gradient elution condition            | 5% B (0–0.5 min), 5%–95% B (0.5–3 min), 95% B (3–4 min),<br>95%–5% B (4–4.1 min), and 5% B (4.1–5 min)                                                                              |
| Ion Source condition                      | Ion spray voltage: 3500 V, sheath gas: 50 Arb, aux gas: 10 Arb, sweep<br>gas: 1 Arb, ion transfer–tube temperature: 325 °C, vaporization temperature: 350 °C, and dwell time: 48 ms |
| MRM transition                            | Quantitative ion pair: $m/z$ 399 > 181 (CE: 16 eV)<br>Confirmatory ions pairs: $m/z$ 399 > 381 (CE: 10 eV) and $m/z$ 399 > 277 (CE: 10 eV)                                          |

**Table S3.** Ptaquiloside (PTA) calibration curve equation, linearity, the limit of detection (LOD), and limit of quantification (LOQ).

| Range ( $\mu$ g/kg) | Equation ( $y = ax + b$ ) | Linearity ( $r^2$ ) | LOD ( $\mu$ g/kg) | LOQ ( $\mu$ g/kg) |
|---------------------|---------------------------|---------------------|-------------------|-------------------|
| 0.1–50              | $y = 37732x + 1079.4$     | 0.9979              | 0.03              | 0.09              |

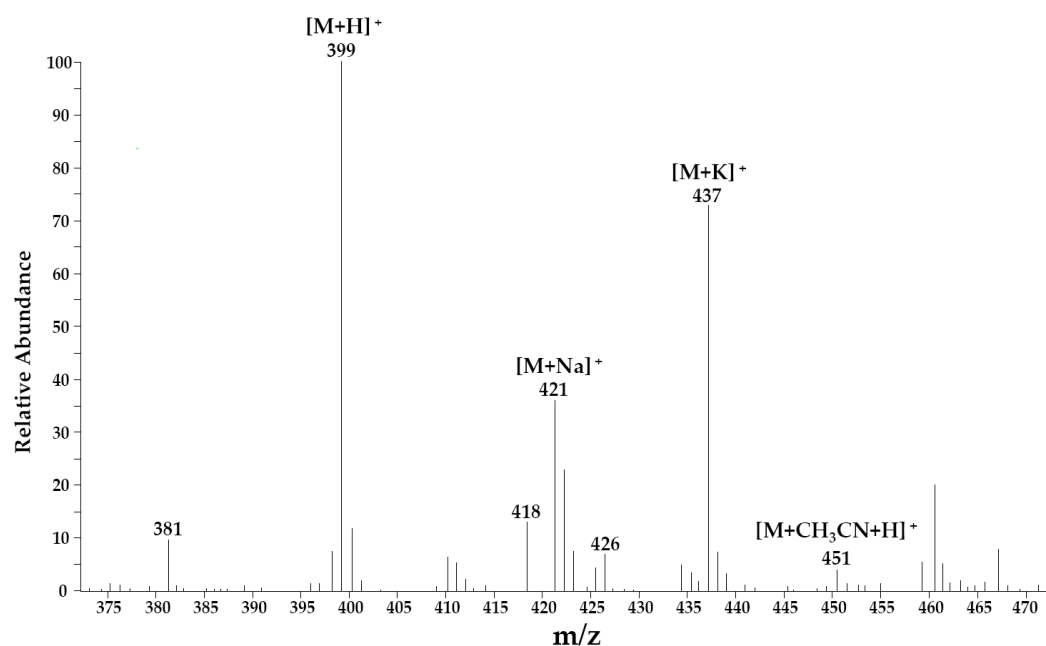

**Figure S1.** Q3 full scan of ptaquiloside (PTA) standard working solution.

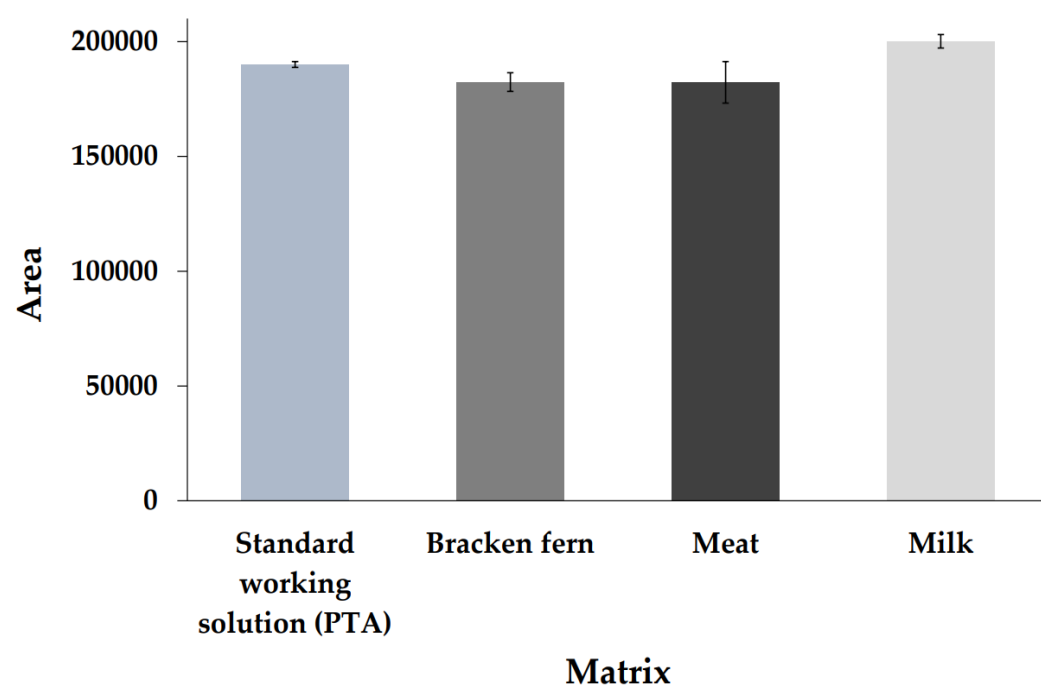

| Matrix       |                                                                                   |
|--------------|-----------------------------------------------------------------------------------|
| Matrix       | The area value difference (%) with the PTA standard working solution <sup>a</sup> |
| Bracken fern | - 4.0                                                                             |
| Meat         | - 4.1                                                                             |
| Milk         | + 5.3                                                                             |

a: The area value difference (%) with the PTA standard working solution = [(the area value of PTA standard working solution – the area value PTA spiked into each matrix) / the area value of PTA standard working solution] × 100 (*n* = 3, and error bars represent standard deviation)

**Figure S2.** Comparison of the relative differences in the peak areas for the same concentration of (20 µg/kg) analyte (ptaquiloside; PTA) in different matrices (bracken fern, meat, and milk) and the standard working solution for PTA.

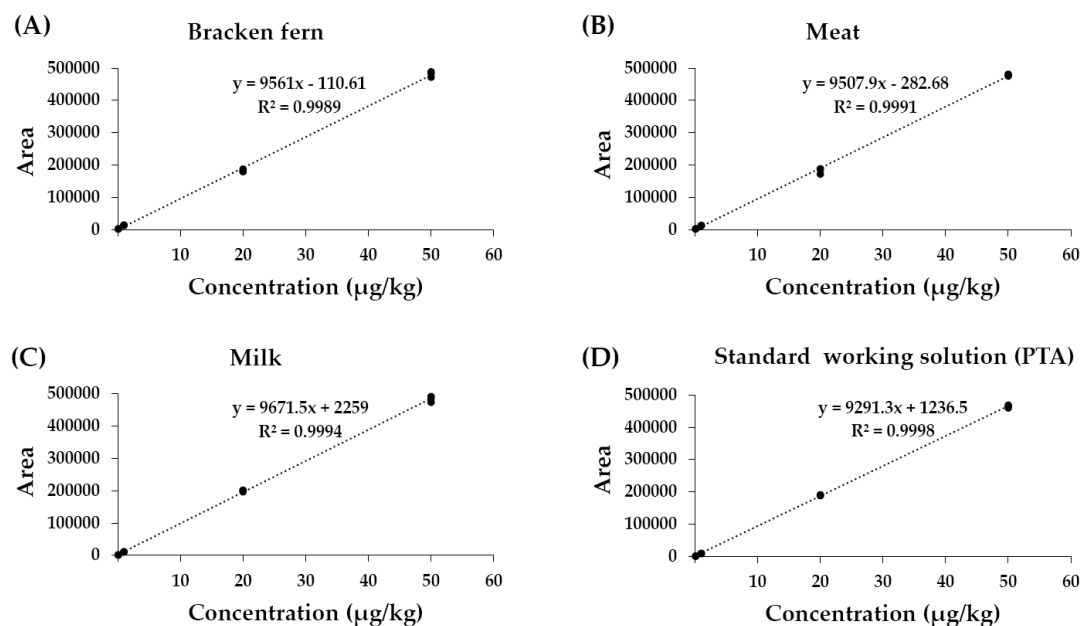

**Figure S3.** A procedure for verifying the relative matrix effect in different matrices: bracken fern (A), meat (B) milk (C), and PTA standard working solution (D).

**Table S4.** Comparison of the slope of each matrix-matched standard calibration curve with the slope of the PTA standard calibration curve.

| Matrix                          | Equation ( $y = ax + b$ ) | Linearity ( $r^2$ ) | Slope difference (%) <sup>a</sup> | Slope CV (%) <sup>b</sup> |
|---------------------------------|---------------------------|---------------------|-----------------------------------|---------------------------|
| Bracken fern                    | $y = 9561x - 110.61$      | 0.9989              | 2.9                               |                           |
| Meat                            | $y = 9507.9x - 282.68$    | 0.9991              | 2.3                               |                           |
| Milk                            | $y = 9671.5x + 2259$      | 0.9994              | 4.1                               | 1.7                       |
| Standard working solution (PTA) | $y = 9291.3x + 1236.5$    | 0.9998              | -                                 |                           |

a: [(Slope value of standard working solution (PTA) calibration curve – the slope values of each matrix-matched standard calibration) / slope value of standard working solution (PTA)] × 100.

b: Precision value (coefficient of variation; CV, %) = [Standard deviation for the slope values of each matrix-matched calibration curve/Mean for the slope values of each matrix-matched calibration curve] × 100.

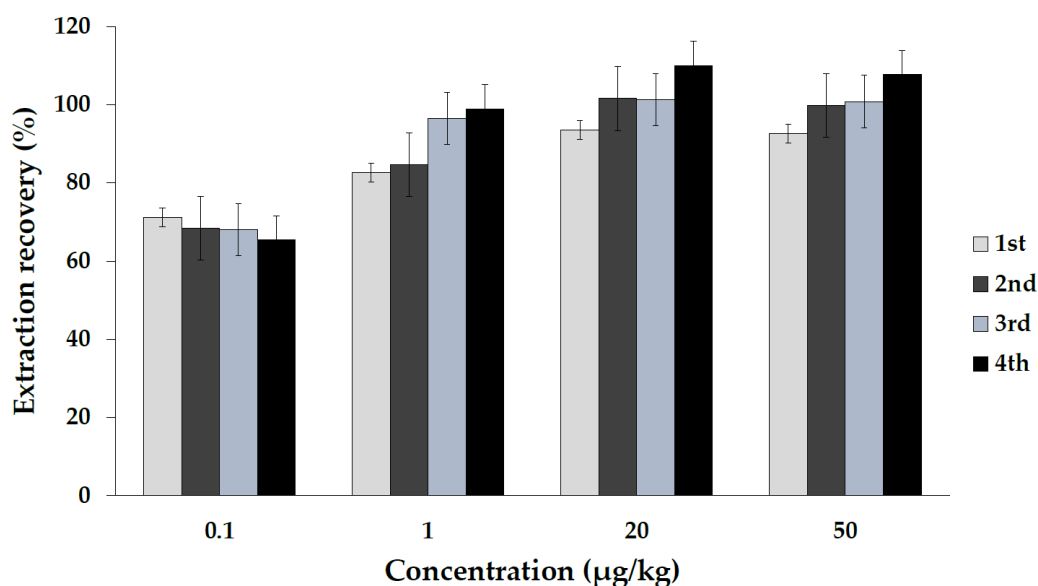

---

**Figure S4.** Extraction recovery (%) at 0.1, 1, 20, and 50 (µg/kg) levels of PTA. Measurements were 4 replicates for each concentration ( $n = 3$ , and the error bars indicate the standard deviation of three samples per assay batch for each concentration). In total, there were  $4 \times 4 \times 3 = 96$  samples analyzed. Extraction recovery (%) = (matrix spiked before extraction / matrix spiked after extraction)  $\times 100$ .
